# Supplementary material
Source: Springer Nature journal article supplement (https://www.springermedizin.de/resource/supplementary/12995_2013_262_MOESM2_ESM.pdf/9623028)

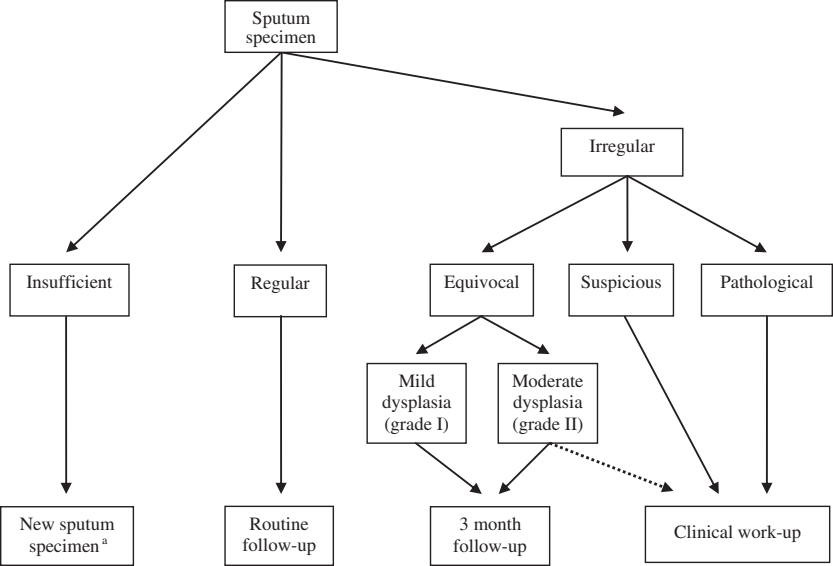

Supplement: MOESM2 [file 9623028]
